**Fig. S1. Mean kinematic profiles for an aquatic species, *Bombina orientalis*.** Indicated from top to bottom are the changes in limb extension, hip angle, knee angle, ankle angle, and mid-foot 1 and mid-foot 2 angles over time. Time is standardized relative to the duration of the limb extension cycle, and the dashed lines represent one standard deviation from the mean.

**Fig. S2. Mean kinematic profiles for a terrestrial species, *Bufo calamita*.** Indicated from top to bottom are the changes in limb extension, hip angle, knee angle, ankle angle, and mid-foot 1 and mid-foot 2 angles over time. Time is standardized relative to the duration of the limb extension cycle, and the dashed lines represent one standard deviation from the mean.

**Fig. S3. Mean kinematic profiles for a terrestrial species, *Rhaebo guttatus*.** Indicated from top to bottom are the changes in limb extension, hip angle, knee angle, ankle angle, and mid-foot 1 and mid-foot 2 angles over time. Time is standardized relative to the duration of the limb extension cycle, and the dashed lines represent one standard deviation from the mean.

**Fig. S4. Mean kinematic profiles for an aquatic species, *Pipa pipa*.** Indicated from top to bottom are the changes in limb extension, hip angle, knee angle, ankle angle, and mid-foot 1 and mid-foot 2 angles over time. Time is standardized relative to the duration of the limb extension cycle, and the dashed lines represent one standard deviation from the mean.

**Fig. S5. Mean kinematic profiles for a semi-aquatic species, *Pelophylax esculenta*.** Indicated from top to bottom are the changes in limb extension, hip angle, knee angle, ankle angle, and mid-foot 1 and mid-foot 2 angles over time. Time is standardized relative to the duration of the limb extension cycle, and the dashed lines represent one standard deviation from the mean.

**Fig. S6. Mean kinematic profiles describing the pelvic sliding in the different species.** Time is standardized relative to the duration of the limb extension cycle, and the dashed lines represent one standard deviation from the mean.

Figure S1

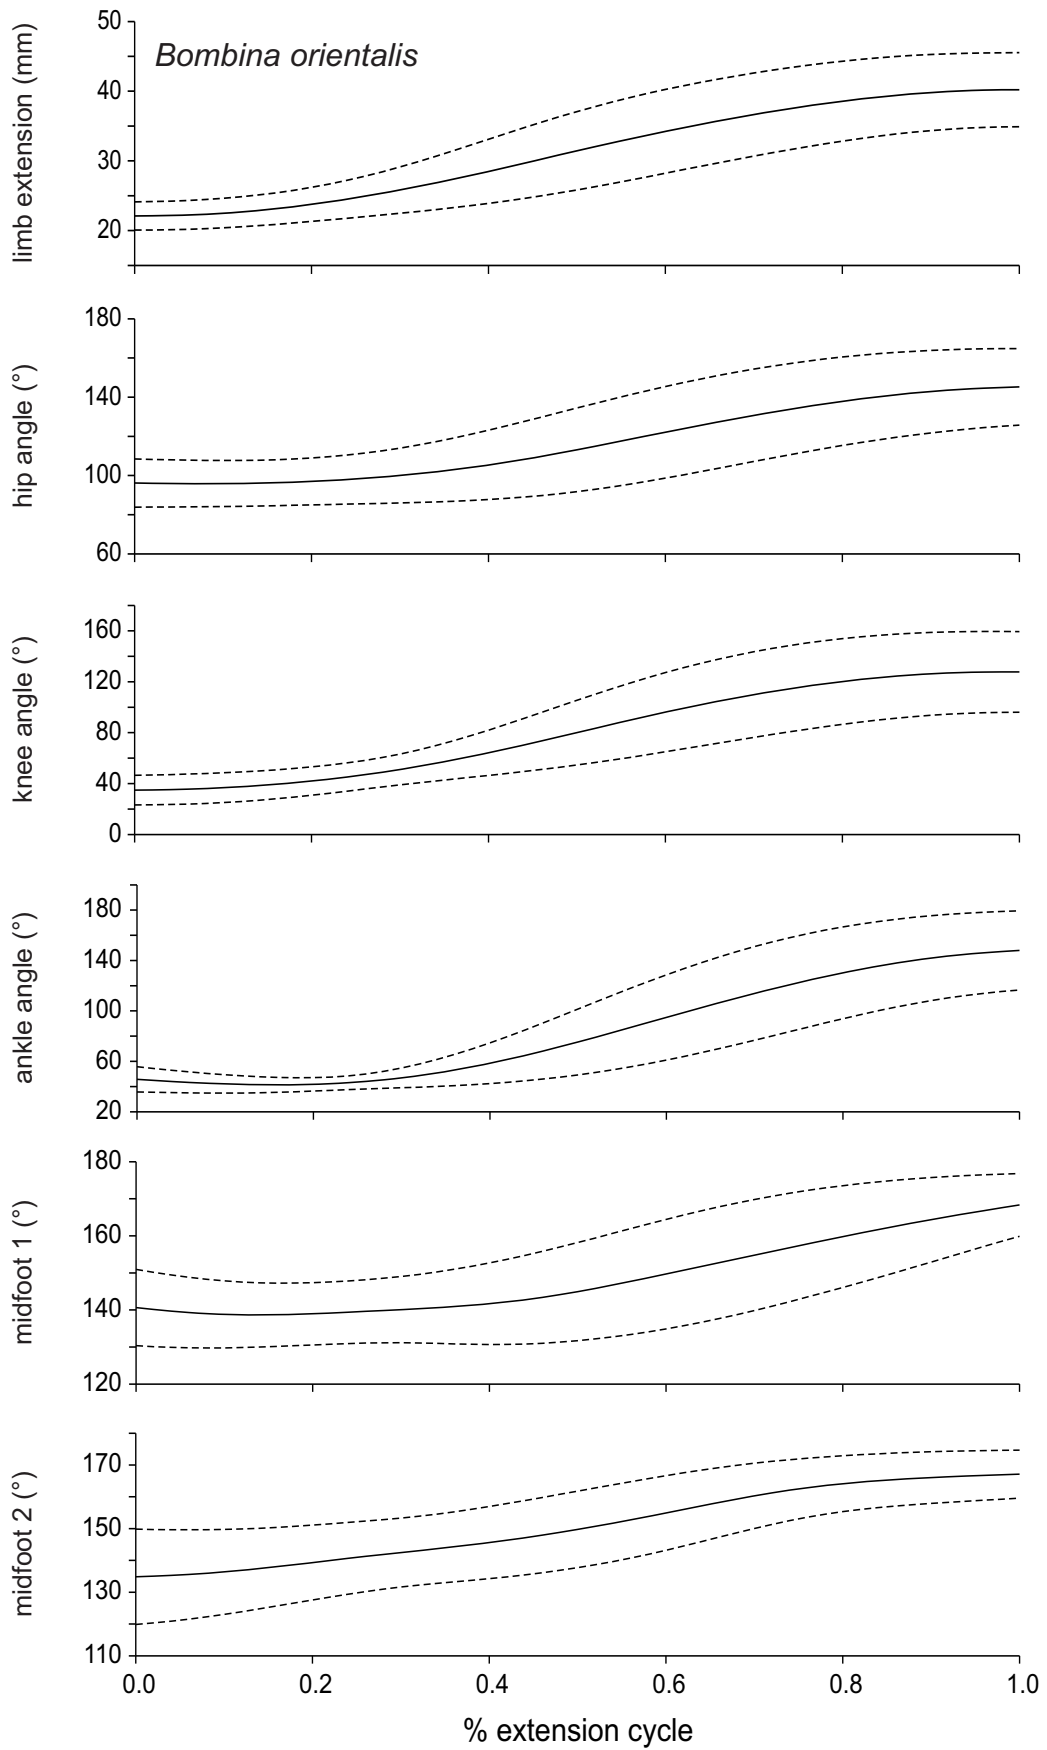

Figure S2

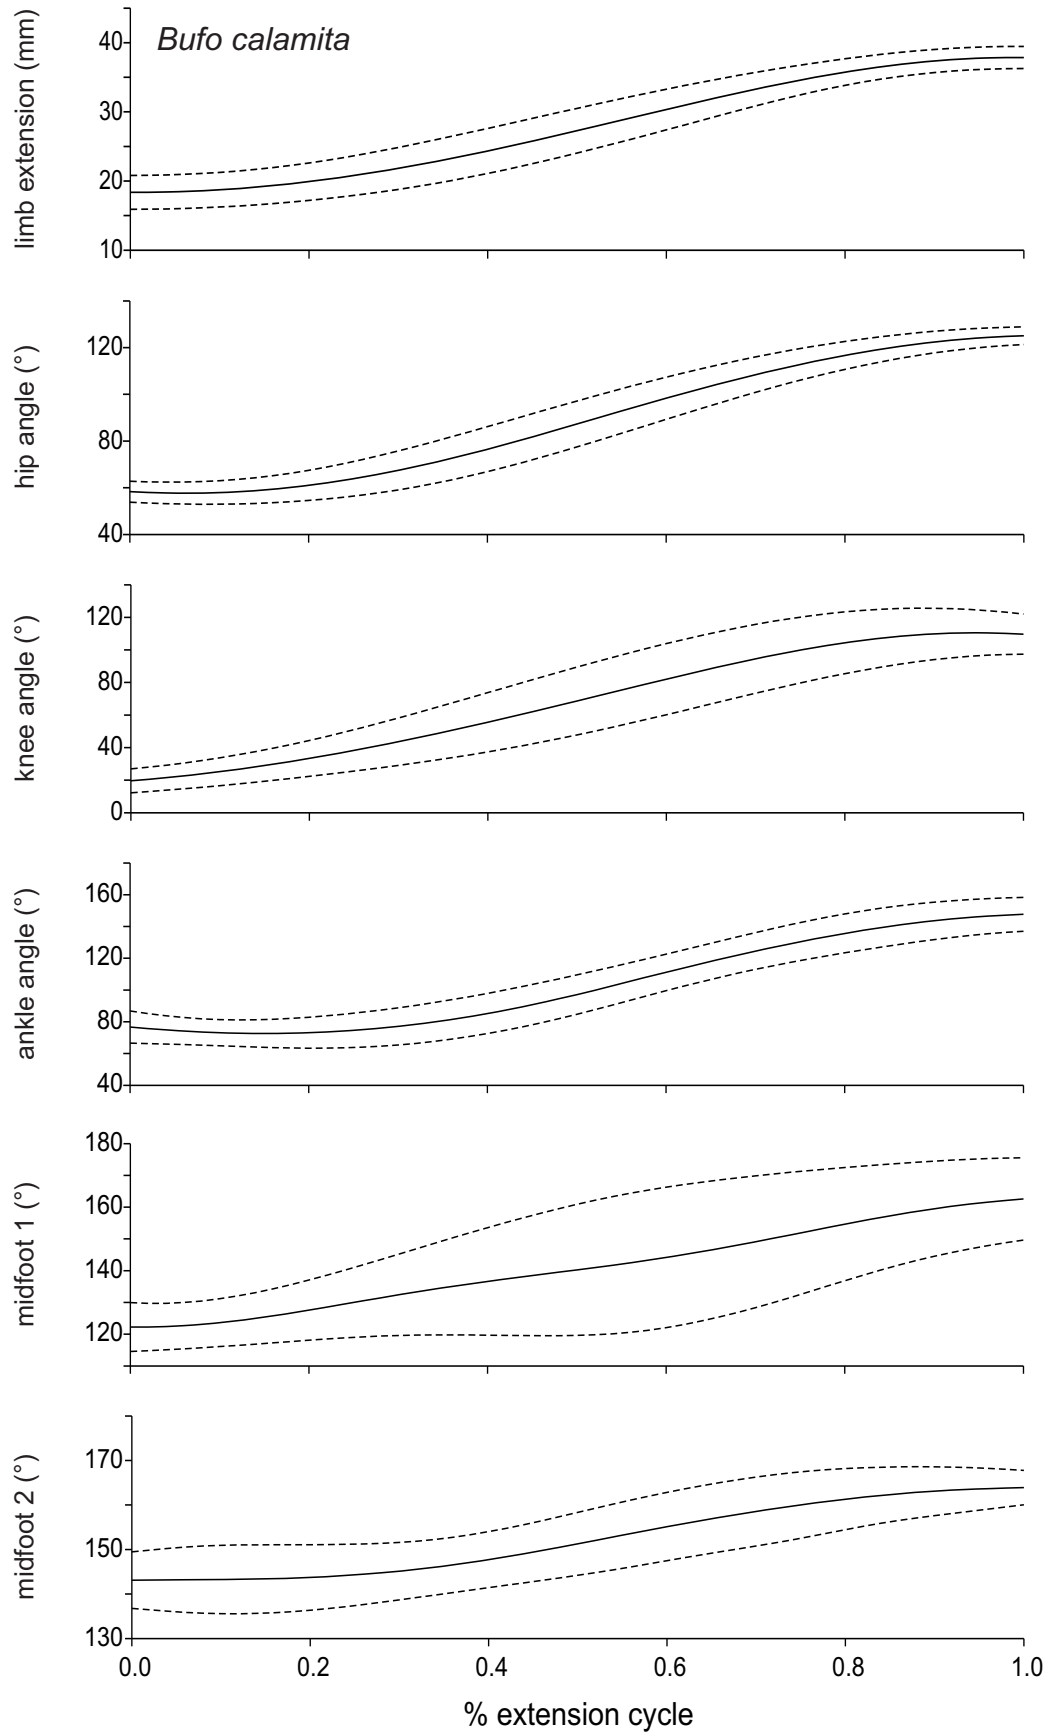

Figure S3

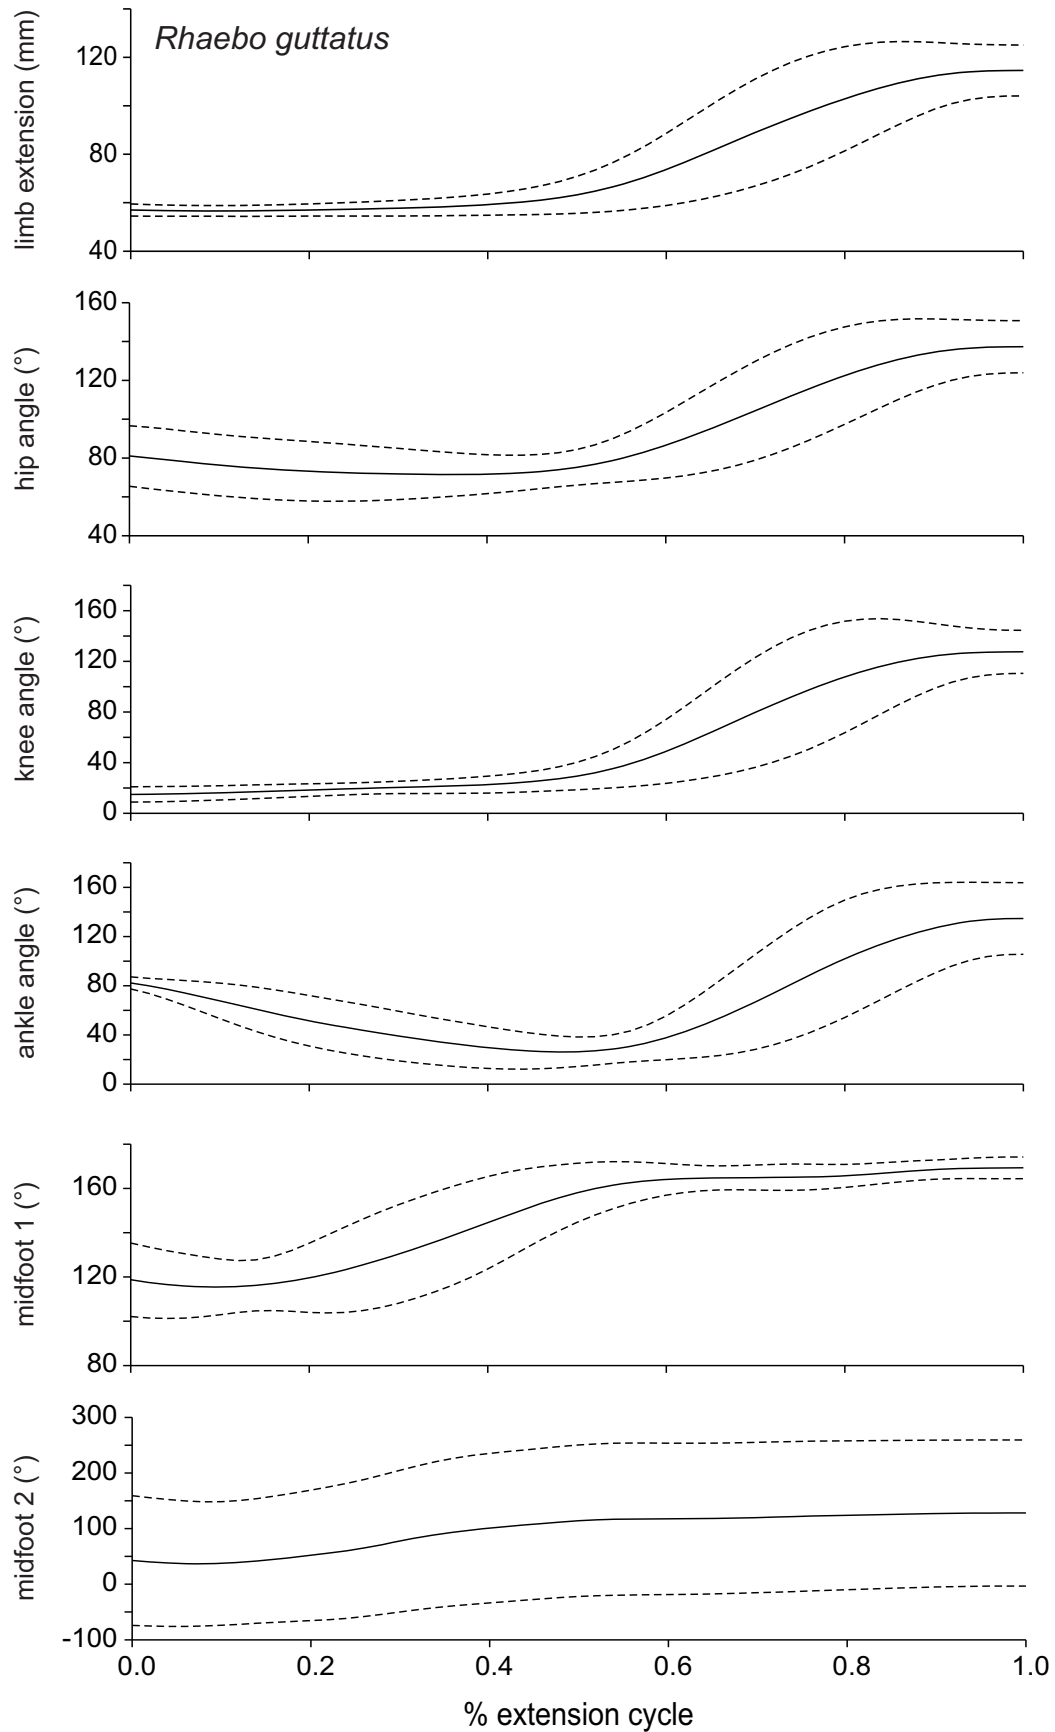

Figure S4

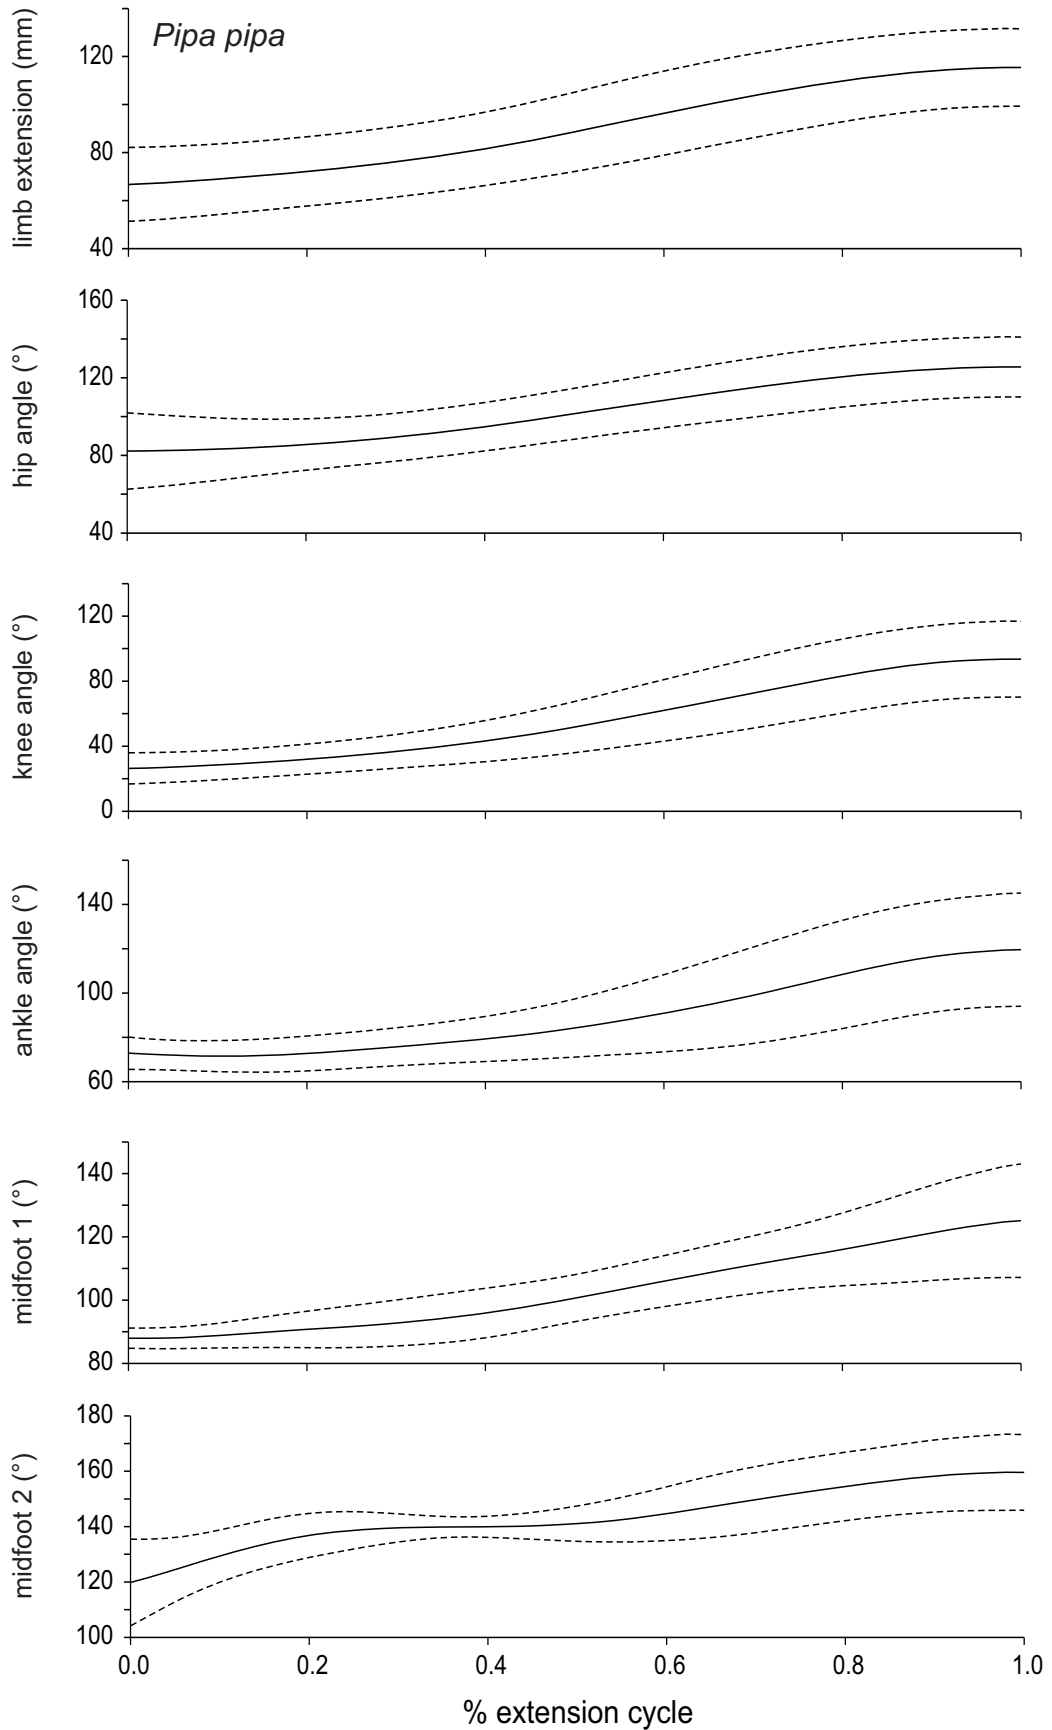

Figure S5

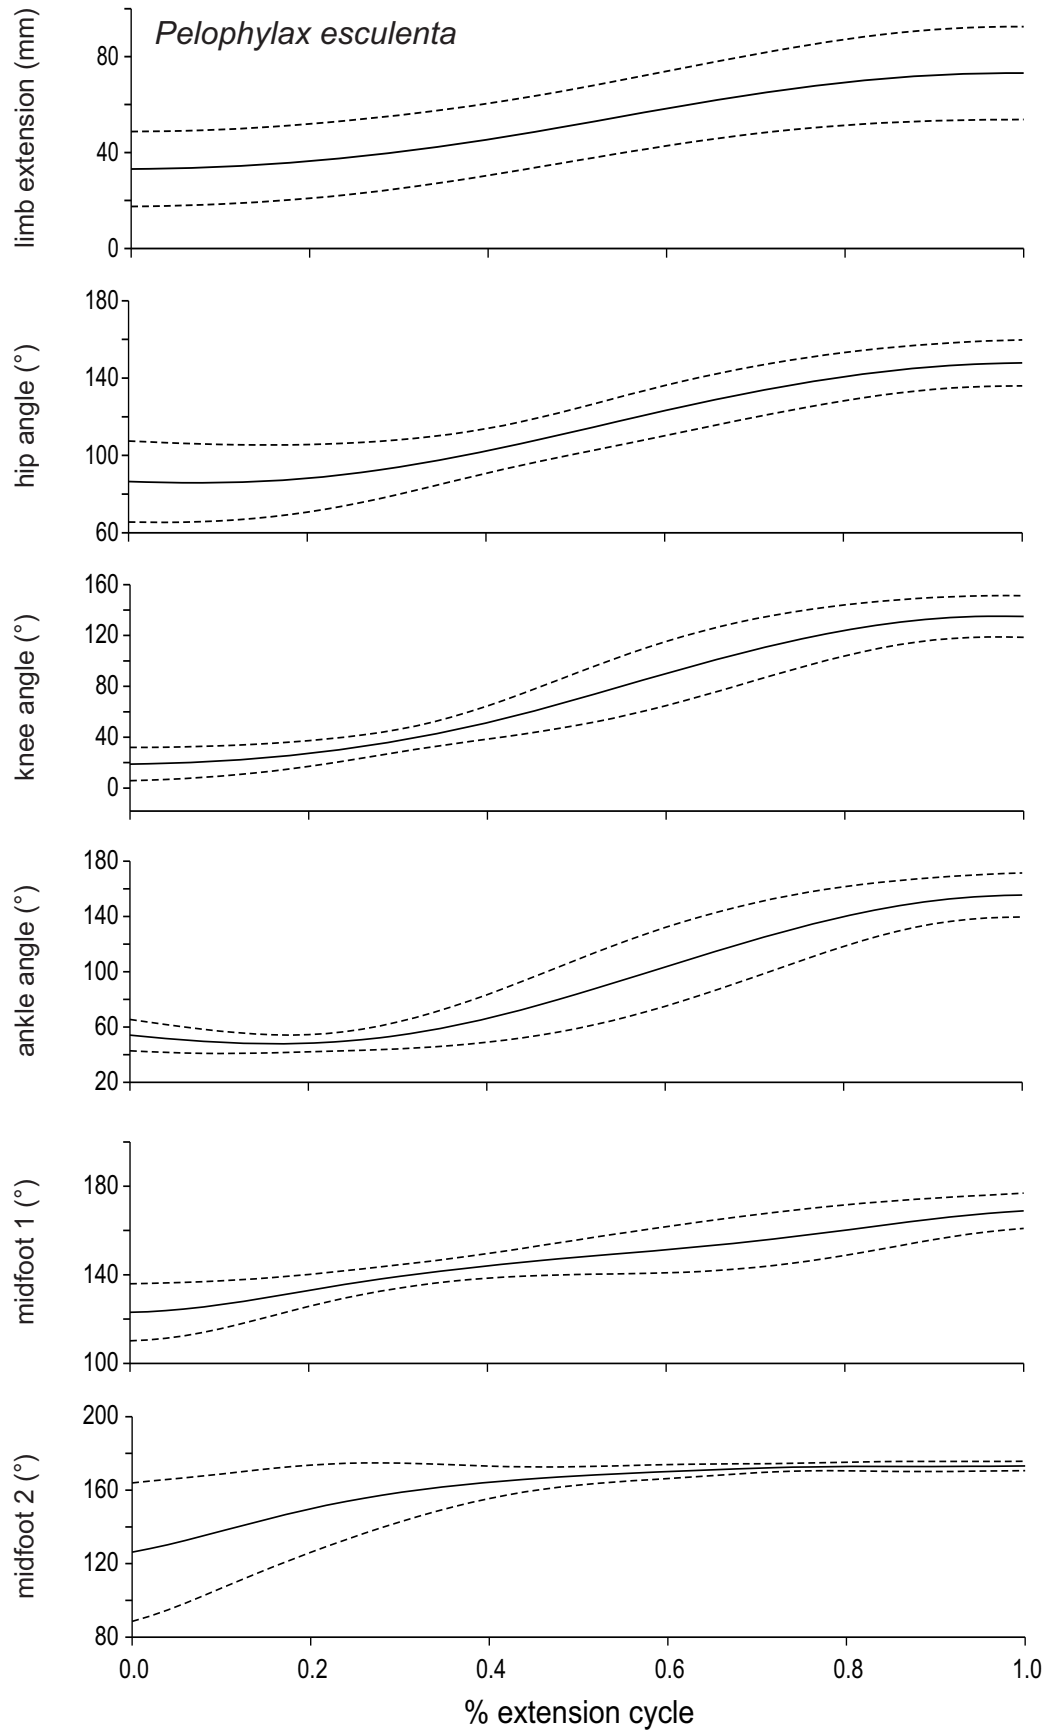

Figure S6

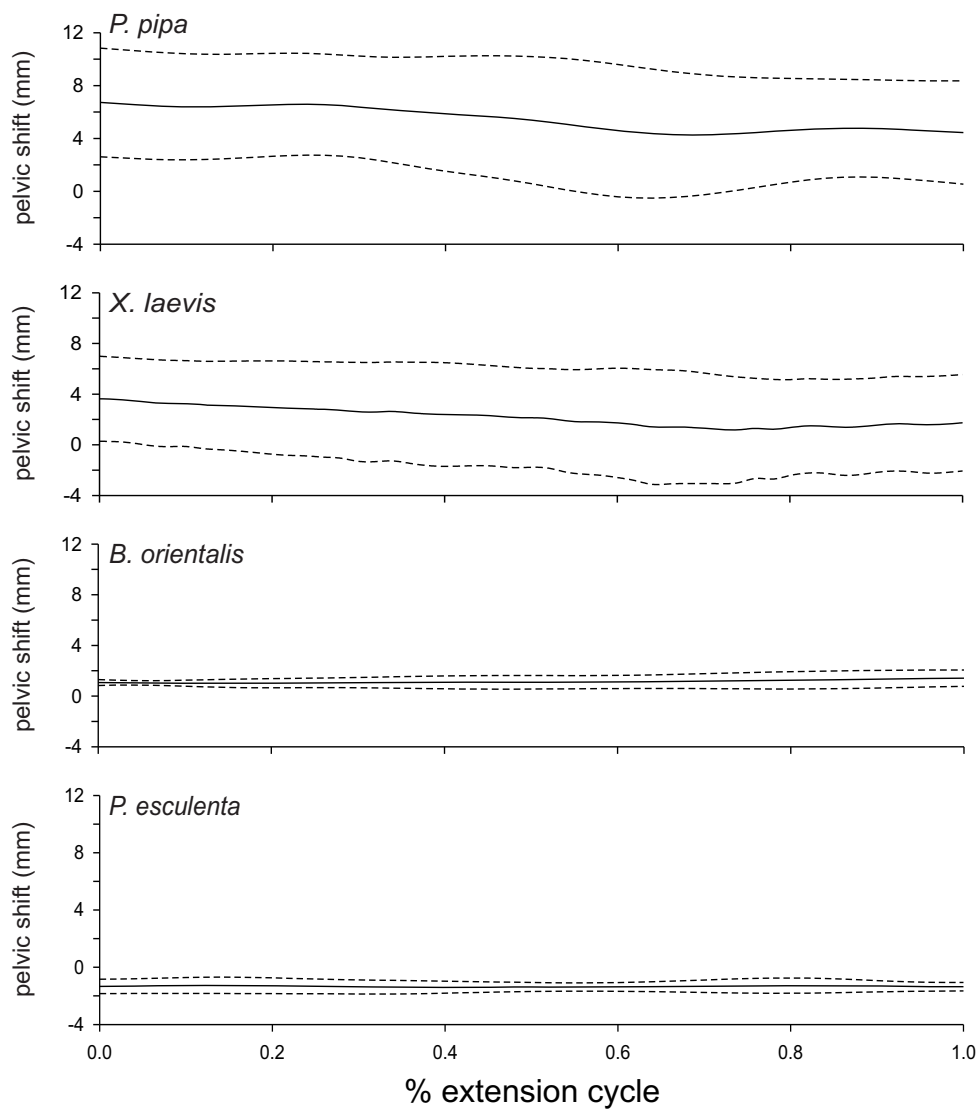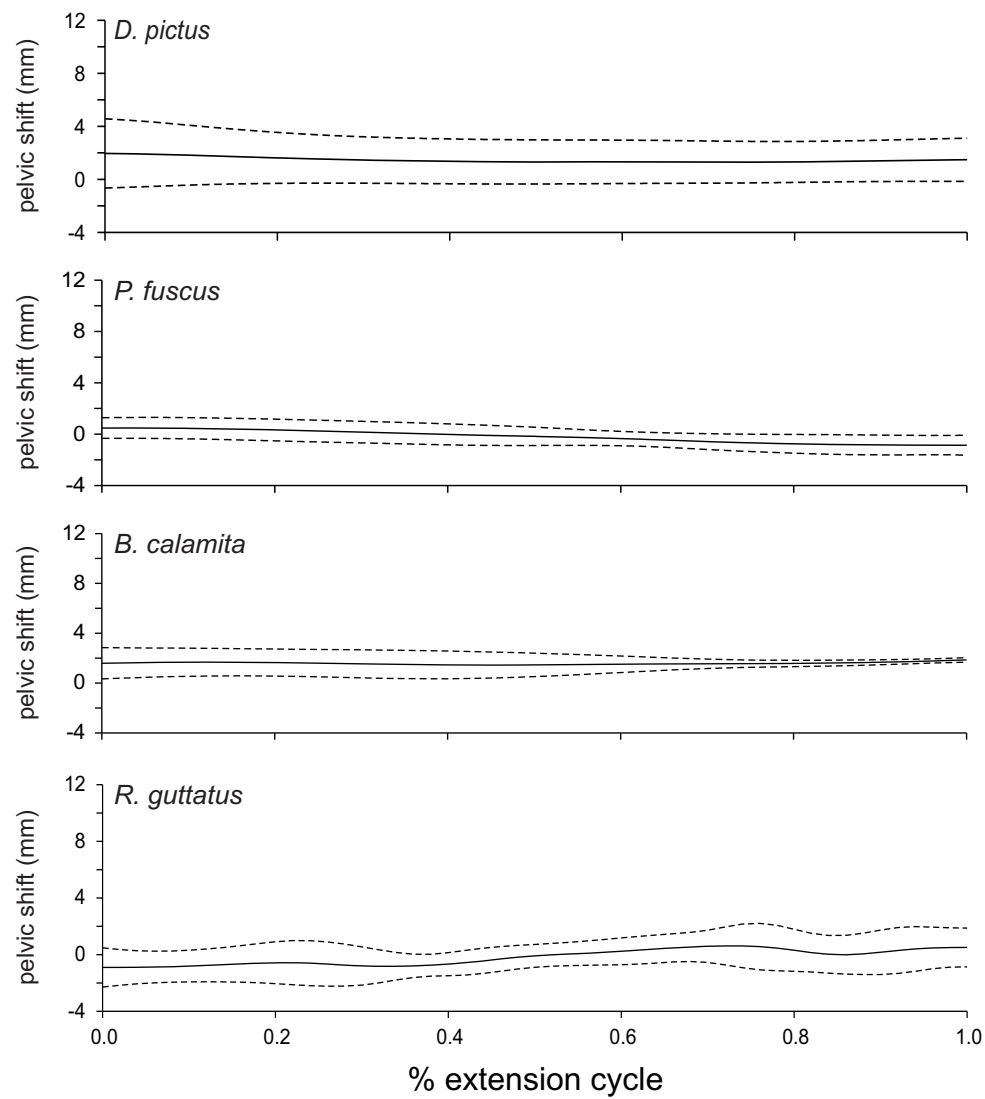

Source: https://cob.silverchair-cdn.com/cob/content_public/journal/jeb/217/20/10.1242_jeb.109991/4/jeb109991.pdf
